# Supplementary material for: Distribution and Medical Impact of Loss-of-Function Variants in the Finnish Founder Population
Source: PLoS Genet. 2014 Jul 31;10(7):e1004494. doi: 10.1371/journal.pgen.1004494 (PMC4117444; doi:10.1371/journal.pgen.1004494)
Supplement: Table S2 — The number of variants in each category in Finns and NFEs. (XLSX) [file pgen.1004494.s008.xlsx]

## Sheet: TableS2
Table S2
		LoF	All Missense	Missense (Probably damaging)	Missense (Possibly damaging)	Missense (Benign)	Synonymous
	(AC=1) Finn	2845	57837	17558	10394	26565	26313
	(AC=1) NFE	9194	207397	59438	37189	99013	101801
	Ratio	0.31	0.28	0.3	0.28	0.27	0.26
	(AC=2) Finn	534	13317	3712	2463	6368	6752
	(AC=2) NFE	1083	32298	8420	5815	16146	18035
	Ratio	0.49	0.41	0.44	0.42	0.39	0.37
	(AC=3) Finn	222	6269	1669	1138	3068	3304
	(AC=3) NFE	339	11910	2880	2058	6207	7034
	Ratio	0.65	0.53	0.58	0.55	0.49	0.47
	(>=0.0005)&(<0.005) Finn	582	17573	4417	3148	8972	1949
	(>=0.0005)&(<0.005) NFE	681	23836	5633	4049	12677	3009
	Ratio	0.85	0.74	0.78	0.78	0.71	0.65
	(>0.005)&(<=0.01) Finn	117	4505	1000	761	2461	2974
	(>0.005)&(<=0.01) NFE	93	4505	992	753	2489	3222
	Ratio	1.26	1	1	1.01	0.99	0.92
	(>0.01)&(<=0.05) Finn	174	8497	1615	1352	4939	6669
	(>0.01)&(<=0.05) NFE	129	7365	1253	1147	4442	6158
	Ratio	1.35	1.15	1.29	1.18	1.11	1.08
	(>0.05) Finn	183	12083	1099	1174	8844	2403
	(>0.05) NFE	191	11652	1043	1128	8590	2356
	Ratio	0.96	1.04	1.05	1.04	1.03	1.02
