# Supplementary material for: Distribution and Medical Impact of Loss-of-Function Variants in the Finnish Founder Population
Source: PLoS Genet. 2014 Jul 31;10(7):e1004494. doi: 10.1371/journal.pgen.1004494 (PMC4117444; doi:10.1371/journal.pgen.1004494)
Supplement: Table S4 — Final list of variants from Sequenom genotyping in 36,262 Finns. The cohorts used in this study are from FINRISK 1992, FINRISK 1997, FINRISK 2002, FINRISK 2007, Health 2000 and Young Finns studies (83 variants + 3 composite variants). (XLSX) [file pgen.1004494.s010.xlsx]

## Sheet: TableS4
Table S4
	Chr	Position	Ref	Alt	Type	Gene	Annotation	#Hom ref	#Het	#Hom nonref	Genotyping Finn_AF	Sequencing Finn_AF	Sequencing NFE_AF	Expected Het	Expected Hom	HWE
	1	17555288	C	CG	frameshift	PADI1	-	35238	519	3	0.00734	0.01131	0.0009	521	2	0.4465
	1	40773150	G	A	stop	COL9A2	full	34981	798	4	0.01126	0.01105	0.00316	797	5	1
	1	41486083	C	A	stop	SLFNL1	full	33429	1617	29	0.02388	0.03517	0.00676	1635	20	0.05
	1	89729566	GC	G	frameshift	GBP5	-	34496	641	4	0.00923	0.0101	0.00224	643	3	0.5485
	1	97915614	C	T	splice	DPYD	partial	33517	1465	20	0.0215	0.01659	0.00268	1473	16	0.3088
	1	109365991	C	T	splice	AKNAD1	partial	33619	2124	36	0.03069	0.03762	0.00045	2129	34	0.6565
	1	151020749	TAGTC	T	frameshift	C1orf56	-	33788	707	7	0.01045	0.01252	0.00179	713	4	0.1075
	1	169581608	G	A	stop	SELP	partial	34926	866	9	0.01235	0.01134	0	873	5	0.1253
	1	196927185	G	T	stop	CFHR2	full	33171	1820	31	0.02687	0.03519	0.00671	1831	25	0.2592
	1	228469903	A	T	stop	OBSCN	partial	33419	2341	44	0.03392	0.02743	0.00305	2347	41	0.6282
	1	236711373	AG	A	frameshift	LGALS8	-	33104	1959	36	0.02893	0.03514	0	1972	29	0.2155
	2	163215655	C	T	stop	GCA	partial	34908	893	11	0.01278	0.01598	0.00179	903	6	0.0532
	2	178969169	GTC	G	frameshift	PDE11A	-	34222	898	7	0.01298	0.01616	0.00313	900	6	0.5351
	2	196759808	A	AT	frameshift	DNAH7	-	34936	801	8	0.01143	0.01051	0.00134	808	5	0.1498
	2	231988421	G	A	stop	HTR2B	partial	34613	1181	9	0.01674	0.01172	0	1179	10	0.8728
	3	126135332	G	A	stop	CCDC37	partial	33549	2171	48	0.03169	0.02991	0.00514	2195	36	0.0467
	3	137843333	G	A	stop	A4GNT	full	34472	569	4	0.00823	0.01132	0.00089	572	2	0.3057
	4	76521525	C	T	splice	CDKL2	full	34251	1490	23	0.02147	0.01948	0.00492	1503	16	0.1015
	4	89318021	T	A	stop	HERC6	partial	33345	1733	26	0.02542	0.02061	0.00089	1740	23	0.4503
	5	140181306	CTGAA	C	frameshift	PCDHA3	-	33410	2344	47	0.03405	0.0311	0.00671	2355	42	0.376
	5	141024690	AAGTC	A	frameshift	FCHSD1	-	34150	941	14	0.0138	0.01494	0.00179	956	7	0.0091
	5	145895394	G	A	stop	GPR151	full	34502	1256	15	0.01797	0.0194	0.00537	1263	12	0.2919
	5	148989259	G	A	splice	ARHGEF37	full	34051	1056	10	0.01532	0.01617	0.0076	1060	8	0.4779
	5	160113099	G	A	stop	ATP10B	full	32747	2292	46	0.03397	0.02932	0.00045	2303	40	0.3701
	6	24429340	CT	C	frameshift	GPLD1	-	34388	1415	19	0.02028	0.01737	0.00492	1424	15	0.2322
	6	25778182	C	T	stop	SLC17A4	partial	34014	1772	22	0.02536	0.0251	0.01565	1770	23	0.915
	6	49808642	G	A	stop	CRISP1	full	34293	855	8	0.01239	0.01262	0.00134	860	5	0.2673
	6	153019099	GAGAT	G	frameshift	MYCT1	-	31828	3825	112	0.05661	0.06093	0.02507	3820	115	0.843
	6	155597005	G	A	stop	CLDN20	full	33768	2049	37	0.02961	0.0271	0	2060	31	0.3108
	6	160969693	T	C	splice	LPA	full	33712	1883	45	0.02768	0.02183	0.00492	1918	27	0.0011
	6	161006077	C	T	splice	LPA	full	32886	3294	82	0.04768	0.04689	0.03533	3293	82	1
	6	combined	-	-	-	LPA	-	31067	4968	227	0.07476	-	-	5017	203	0.0683
	6	170036466	C	A	splice	WDR27	partial	34109	938	6	0.01355	0.01217	0.00586	937	6	1
	7	15601409	T	TAA	frameshift	TMEM195	-	34659	1114	17	0.01604	0.02102	0.00268	1130	9	0.0169
	7	18066967	CATACA	C	frameshift	PRPS1L1	-	32248	3386	101	0.0502	0.05335	0.02415	3408	90	0.2222
	7	20666235	G	C	splice	ABCB5	partial	30082	5388	267	0.08286	0.06178	0.0083	5431	245	0.1344
	7	53103512	C	T	stop	POM121L12	full	32808	2527	78	0.03788	0.0266	0.0009	2581	51	0.0002
	7	75401263	C	T	stop	CCL26	full	34930	891	6	0.0126	0.02425	0.01342	892	6	0.8302
	7	92164318	C	T	stop	C7orf64	partial	30517	4361	137	0.06619	0.06854	0.02816	4328	153	0.1664
	7	123197691	G	C	stop	NDUFA5	partial	31994	2997	68	0.04468	0.04082	0.00568	2993	70	0.8512
	7	143048771	C	T	stop	CLCN1	full	34632	1120	13	0.01602	0.01536	0.00045	1128	9	0.1805
	8	17726470	A	AT	frameshift	FGL1	-	32954	2514	63	0.03715	0.03877	0.00045	2542	49	0.0447
	8	38839282	GAA	G	frameshift	HTRA4	-	34843	930	10	0.01327	0.01373	0.00313	937	6	0.151
	8	144942134	CCTTT	C	frameshift	EPPK1	-	34154	1619	21	0.0232	0.0206	0	1622	19	0.6406
	9	21304913	G	A	stop	IFNA5	full	34211	1543	23	0.02221	0.01657	0.00581	1554	18	0.1806
	9	21481483	G	A	stop	IFNE	full	33924	1134	14	0.01657	0.01904	0.00134	1143	10	0.1408
	9	138589474	C	T	splice	SOHLH1	full	34816	992	15	0.01426	0.01173	0	1007	7	0.0078
	9	140355198	G	A	splice	PNPLA7	partial	34442	1333	16	0.01907	0.01909	0.00762	1339	13	0.3938
	10	27687534	C	CT	frameshift	PTCHD3	-	32838	2182	52	0.03259	0.04058	0.00493	2211	37	0.0173
	10	75187483	G	A	stop	ZMYND17	full	34967	817	7	0.01161	0.01819	0.00179	821	5	0.3475
	10	90492297	C	T	stop	LIPK	full	34437	673	6	0.00975	0.01011	0.00224	678	3	0.1539
	10	105209356	CAG	C	frameshift	CALHM2	-	33416	2293	48	0.03341	0.03796	0.00939	2309	40	0.1893
	11	59863030	G	A	splice	MS4A2	full	33769	1307	15	0.01905	0.01377	0.00089	1312	13	0.4743
	11	73978243	G	A	stop	P4HA3	partial	16564	15276	3795	0.32084	0.31727	0.15229	15530	3668	0.0021
	12	49691057	G	A	splice	PRPH	full	34170	1553	23	0.02237	0.01617	0.00539	1563	18	0.2242
	12	49919826	T	TA	frameshift	SPATS2	-	34419	726	7	0.01053	0.01212	0.00134	732	4	0.1169
	12	58190244	C	T	stop	TSFM	partial	34928	886	0	0.01237	0.01184	0	875	5	0.0077
	13	20426175	G	C	stop	ZMYM5	full	34287	809	9	0.01178	0.01375	0.00134	817	5	0.0647
	13	100518634	C	T	stop	CLYBL	full	30879	2210	39	0.03453	0.03759	0.03491	2209	40	1
	14	45658326	C	T	stop	FANCM	full	35122	636	5	0.00903	0.01293	0	640	3	0.2216
	14	45667921	C	T	stop	FANCM	full	36060	201	1	0.0028	0.00405	0.00089	202	0	0.2469
	14	combined	-	-	-	FANCM	-	35422	833	7	0.01168	-	-	837	5	0.3541
	14	55890937	T	A	stop	TBPL2	full	34176	780	11	0.01147	0.01091	0	793	5	0.007
	14	94754643	C	T	stop	SERPINA10	full	34505	1199	11	0.01709	0.01659	0.00492	1200	10	0.7537
	14	94756669	G	A	stop	SERPINA10	full	36170	92	0	0.00127	0.00081	0.0076	92	0	1
	14	combined	-	-	-	SERPINA10	-	34965	1283	14	0.01808	-	-	1287	12	0.4604
	14	94964104	G	A	stop	SERPINA12	full	34284	817	6	0.01181	0.01657	0.00716	819	5	0.4955
	15	40584274	AC	A	frameshift	PLCB2	-	34675	1014	8	0.01443	0.01292	0	1015	7	0.711
	15	45393425	TGAAC	T	frameshift	DUOX2	-	34415	664	6	0.00963	0.01334	0.00269	669	3	0.1469
	15	59910888	C	T	stop	GCNT3	full	34994	744	9	0.01066	0.01496	0.00089	754	4	0.0218
	16	775236	C	T	splice	CCDC78	partial	35046	633	6	0.00904	0.01536	0.00089	639	3	0.0733
	16	47495300	G	A	stop	PHKB	partial	34739	1019	15	0.01466	0.01444	0.00048	1034	8	0.015
	16	67236109	A	T	stop	ELMO3	full	34047	1692	26	0.02438	0.01657	0.00268	1701	21	0.267
	16	84495318	A	C	splice	ATP2C2	full	34178	1563	28	0.02263	0.02061	0.0085	1582	18	0.0301
	17	28268857	G	A	splice	EFCAB5	partial	34551	1217	13	0.01737	0.01602	0.00583	1221	11	0.4388
	17	60469326	C	T	stop	EFCAB3	full	31576	2831	63	0.04289	0.0388	0.00626	2830	63	1
	18	48331611	CAG	C	frameshift	MRO	-	33955	1154	19	0.01697	0.02342	0.00984	1172	10	0.0092
	19	12089469	C	T	stop	ZNF763	full	33920	1073	14	0.01573	0.01334	0.00134	1084	9	0.0801
	19	38055730	G	A	stop	ZNF571	full	32746	3003	77	0.04406	0.0393	0.00403	3018	70	0.3465
	19	49129357	T	G	splice	SPHK2	partial	34249	1418	14	0.02026	0.0187	0.00328	1417	15	1
	19	49206674	G	A	stop	FUT2	full	3393	12254	9256	0.61772	0.37662	0.47139	11761	9502	3.69e-11
	19	56423863	C	CA	frameshift	NLRP13	-	35129	679	3	0.00956	0.01131	0.00179	678	3	1
	19	57987104	C	T	stop	ZNF772	partial	33489	1613	22	0.02359	0.01739	0.00894	1618	20	0.561
	19	58773815	C	T	stop	ZNF544	partial	32421	2632	69	0.03943	0.03597	0.01118	2661	55	0.0482
	20	49211125	CTG	C	frameshift	FAM65C	-	34242	1510	18	0.02161	0.01817	0	1513	17	0.7069
	22	41257834	T	TA	frameshift	DNAJB7	-	33281	1758	29	0.02589	0.01939	0.00492	1769	24	0.243
