# Supplementary material for: Distribution and Medical Impact of Loss-of-Function Variants in the Finnish Founder Population
Source: PLoS Genet. 2014 Jul 31;10(7):e1004494. doi: 10.1371/journal.pgen.1004494 (PMC4117444; doi:10.1371/journal.pgen.1004494)
Supplement: Table S6 — List of 60 blood pressure measures and biochemical assays from plasma/serum of fasting subjects. (XLSX) [file pgen.1004494.s012.xlsx]

## Sheet: TableS6
Table S6
	Trait	Description
	Systolic bp	Systolic blood pressure
	Diastolic bp	Diastolic blood pressure
	HDL	High density lipoprotein
	Triglycerides	Triglycerides
	LDL	Low density lipoprotein
	Lp(a)	Lipoprotein (a)
	APOA1	Apolipoprotein A-I
	APOB	Apolipoprotein B
	Galectin-3	Galectin-3
	LPS	Lipopolysaccharide
	CRP	C reactive protein
	HGF	Hepatocyte growth factor
	SCF	Stem cell factor
	SDF1	Stromal cell derived factor 1 (CXCL12)
	TNF-beta	Tumor necrosis factor beta
	TRAIL	TNF related apoptosis inducing ligand
	IL4	Interleukin 4
	IL6	Interleukin 6
	IL10	Interleukin 10
	IL12	Interleukin 12
	IL17	Interleukin 17
	Eotaxin	Eotaxin (CCLL11)
	FGF	Fibroblast growth factor
	GCSF	Granulocyte colony stimulating factor
	GM-CSF	Granulocyte monocyte colony stimulating factor
	IFN-gamma	Interferon_gamma
	MCP1	Monocyte chemoattractant protein 1 (CCL2)
	PDGF	Platelet derived growth factor
	MIP1B	Macrophage inflammatory protein 1 beta (CCL4)
	RANTES	Regulated on Activation, Normal T cell Expressed and Secreted (CCL5)
	VEGF	Vascular endothelial cell growth factor A
	Active-B12	Active vitamin B12
	Adiponectin	Adiponectin
	BNP	Brain_natriuretic_peptide
	CK_MB	Creatine kinase isoenzyme MB
	Creatinine	Creatinine
	Vasopressin	C terminal pro vasopressin
	Endothelin1	C terminal pro endothelin 1
	Cystatin-C	Cystatin C
	D-dimer	D-dimer
	Ferritin	Ferritin
	Homocysteine	Homocysteine
	IL18	Interleukin 18
	IL1_RA	Interleukin1 receptor antagonist
	Leptin	Leptin
	MPO	Myeloperoxidase
	Adrenomedullin	Mid regional pro adrenomedullin
	ANP	Mid regional pro atrial natriuretic peptide
	Neopterin	Neopterin
	BNP	N terminal prohormone of brain natriuretic peptide
	PLA_A	Phospholipase A2 activity
	PLA_M	Phospholipase A2 mass
	PLGF	Placental growth factor
	PON1	Paraoxonase 1
	TIMP1	Tissue inhibitor metalloproteinase 1
	Glucose	Glucose corrected for fasting
	Insulin	Insulin corrected for fasting
	Testerone	Testerone
	Vitamin-B12	Vitamin B12 (Cobalamin)
	Vitamin-D	Vitamin D
