# Supplementary material for: Distribution and Medical Impact of Loss-of-Function Variants in the Finnish Founder Population
Source: PLoS Genet. 2014 Jul 31;10(7):e1004494. doi: 10.1371/journal.pgen.1004494 (PMC4117444; doi:10.1371/journal.pgen.1004494)
Supplement: Table S7 — Correlations between the combined LPA variant and various disease states. The rows with significant correlation between the levels of the biomarker and disease status (P<1×10−3) are shaded in blue and the rows with significant association (P≤0.05) between the variant and disease status (allelic or homozygous tests) are highlighted in red text. (XLSX) [file pgen.1004494.s013.xlsx]

## Sheet: TableS7
Table S7
		T-test		Association of combined LPA variant with Lp(a) levels adjusted for disease				Association of combined LPA variant with disease					Association of combined LPA homozygotes with disease
	Disease	Higher Lp(a)	Lower Lp(a)	N	Beta	SE	P-value	N	N	Beta	SE	P-value	Case	Case	Case	Control	Control	Control	OR	P-value
		levels	levels					cases	controls				aa	Aa	AA	aa	Aa	AA
	Cardio vascular disease	0.000673	0.999	6696	-0.607	0.031	3.03e-81	2272	23508	-0.112	0.063	0.0773	12	302	1958	160	3335	20013	0.77	0.499
	Coronary heart disease	0.000819	0.999	6696	-0.607	0.031	2.81e-81	1645	24135	-0.153	0.074	0.0386	6	215	1424	166	3422	20547	0.53	0.156
	Myocardial infarction	0.0104	0.99	6696	-0.608	0.031	1.91e-81	953	24827	-0.148	0.094	0.118	3	125	825	169	3512	21146	0.46	0.223
	Acute coronary syndrome	0.0123	0.988	6696	-0.608	0.031	2.2e-81	1286	24494	-0.111	0.081	0.17	6	171	1109	166	3466	20862	0.69	0.481
	Stroke	0.0372	0.963	6696	-0.608	0.031	2.21e-81	1038	24742	-0.048	0.086	0.58	8	140	890	164	3497	21081	1.16	0.694
	Major adverse cardiac events	0.043	0.957	6696	-0.608	0.031	2.12e-81	3207	22573	-0.057	0.054	0.287	20	442	2745	152	3195	19226	0.93	0.817
	Ischemic heart disease	0.302	0.698	6696	-0.609	0.031	1.71e-81	2757	23023	-0.009	0.057	0.878	19	391	2347	153	3246	19624	1.04	0.901
	Cancer	0.643	0.357	6696	-0.608	0.031	2.33e-81	1934	23846	0.079	0.062	0.2	14	296	1624	158	3341	20347	1.09	0.77
	Rheumatoid arthritis	0.913	0.0868	6696	-0.608	0.031	2.83e-81	1149	24631	0.015	0.079	0.853	10	162	977	162	3475	20994	1.33	0.353
	Asthma	0.94	0.0597	6696	-0.608	0.031	2.4e-81	3137	22643	0.025	0.05	0.611	19	460	2658	153	3177	19313	0.9	0.726
	Heart failure	0.981	0.0192	6696	-0.608	0.031	2.86e-81	1557	24223	0.044	0.07	0.526	14	226	1317	158	3411	20654	1.38	0.258
	High blood pressure	0.998	0.002	6696	-0.607	0.031	4.07e-81	5197	20583	0.07	0.042	0.0971	47	757	4393	125	2880	17578	1.49	0.022
	Diabetes	1	5.27e-07	6696	-0.607	0.031	2.12e-81	2866	22914	0.03	0.053	0.57	22	414	2430	150	3223	19541	1.17	0.465
