# Supplementary material for: Distribution and Medical Impact of Loss-of-Function Variants in the Finnish Founder Population
Source: PLoS Genet. 2014 Jul 31;10(7):e1004494. doi: 10.1371/journal.pgen.1004494 (PMC4117444; doi:10.1371/journal.pgen.1004494)
Supplement: Table S10 — Association of the composite LPA variant with different diseases. (XLSX) [file pgen.1004494.s016.xlsx]

## Sheet: TableS10
Table S10
	Diseases	Total_Num	Num_Cases	HR	SE	P-value
	Incident Stroke	25337	617	0.83	0.11	0.11
	Incident Coronary Heart Disease + Stroke	24813	1483	0.8	0.074	0.003
	Incident Myocardial Infarction	25222	590	0.8	0.12	0.06
	Incident Acute Coronary Syndrome	25151	850	0.8	0.1	0.03
	Incident Heart Failure	25119	1081	1.06	0.077	0.44
	Incident Type 2 Diabetes	24108	1375	1	0.071	0.9
